# Supplementary material for: Fatty Acids Composition of Blood Cell Membranes and Peripheral Inflammation in the PREDIMED Study: A Cross-Sectional Analysis
Source: PubMed Central journal article supplement (PMC6471987; doi:10.3390/nu11030576), 2019-03-07
Supplement: nutrients-11-00576-s001.pdf [file nutrients-11-00576-s001.pdf]

**Supplementary Table S1.** Fatty acids percentages (mean  $\pm$  standard deviation) in blood cell membranes at baseline in the study population

| <b>Fatty acids</b> | <b>Total</b>     | <b>Control (n=177)</b> | <b>Cases (n=105)</b> |
|--------------------|------------------|------------------------|----------------------|
| C14:0              | 1.04 $\pm$ 0.52  | 1.07 $\pm$ 0.60*       | 0.95 $\pm$ 0.30      |
| C16:0              | 22.48 $\pm$ 3.06 | 22.35 $\pm$ 2.98       | 22.68 $\pm$ 3.18     |
| C16:1n7trans       | 0.23 $\pm$ 0.11  | 0.21 $\pm$ 0.11        | 0.23 $\pm$ 0.09      |
| C16:1n7cis         | 0.43 $\pm$ 0.21  | 0.40 $\pm$ 0.19        | 0.45 $\pm$ 0.22      |
| C18:0              | 18.54 $\pm$ 2.1  | 18.46 $\pm$ 2.18       | 18.64 $\pm$ 1.96     |
| C18:1n9cis         | 17.47 $\pm$ 2.59 | 17.11 $\pm$ 2.40       | 18.06 $\pm$ 2.78     |
| C18:1n9trans       | 1.45 $\pm$ 0.25  | 1.41 $\pm$ 0.26        | 1.49 $\pm$ 0.21      |
| C18:2n6            | 11.16 $\pm$ 2.09 | 11.24 $\pm$ 2.03       | 11.00 $\pm$ 2.17     |
| C18:3n3            | 0.1 $\pm$ 0.05   | 0.09 $\pm$ 0.04        | 0.09 $\pm$ 0.04      |
| C20:0              | 0.21 $\pm$ 0.09  | 0.19 $\pm$ 0.08        | 0.20 $\pm$ 0.08      |
| C20:1n9            | 0.37 $\pm$ 0.12  | 0.33 $\pm$ 0.10        | 0.40 $\pm$ 0.11      |
| C20:2n6            | 0.32 $\pm$ 0.12  | 0.31 $\pm$ 0.13        | 0.31 $\pm$ 0.07      |
| C20:3n6            | 1.75 $\pm$ 0.43  | 1.72 $\pm$ 0.41        | 1.76 $\pm$ 0.44      |
| C20:4n6            | 14.44 $\pm$ 2.99 | 14.59 $\pm$ 2.88       | 14.14 $\pm$ 3.16     |
| C20:5n3            | 0.58 $\pm$ 0.37  | 0.57 $\pm$ 0.40        | 0.57 $\pm$ 0.30      |
| C22:0              | 0.15 $\pm$ 0.16  | 0.17 $\pm$ 0.16*       | 0.10 $\pm$ 0.10      |
| C22:4n6            | 2.53 $\pm$ 0.81  | 2.62 $\pm$ 0.81*       | 2.35 $\pm$ 0.74      |
| C22:5n6            | 0.43 $\pm$ 0.18  | 0.44 $\pm$ 0.18*       | 0.38 $\pm$ 0.14      |
| C22:5n3            | 1.45 $\pm$ 0.44  | 1.48 $\pm$ 0.45*       | 1.38 $\pm$ 0.40      |
| C24:0              | 0.3 $\pm$ 0.3    | 0.34 $\pm$ 0.32        | 0.20 $\pm$ 0.21      |
| C22:6n3            | 4.4 $\pm$ 1.41   | 4.43 $\pm$ 1.45*       | 4.30 $\pm$ 1.32      |
| C24:1n9            | 0.3 $\pm$ 0.31   | 0.33 $\pm$ 0.33        | 0.21 $\pm$ 0.24      |
| Total SFA          | 42.69 $\pm$ 4.52 | 42.61 $\pm$ 4.49       | 42.80 $\pm$ 4.60     |
| Total MUFA         | 18.55 $\pm$ 2.69 | 18.20 $\pm$ 2.47       | 19.13 $\pm$ 2.93     |
| Total n-6 PUFA     | 30.6 $\pm$ 4.96  | 30.95 $\pm$ 4.74       | 29.96 $\pm$ 5.26     |
| LCn-3 PUFA         | 6.42 $\pm$ 2.02  | 6.49 $\pm$ 2.10        | 6.26 $\pm$ 1.88      |
| Total n-3 PUFA     | 6.51 $\pm$ 2.03  | 6.59 $\pm$ 2.10        | 6.36 $\pm$ 1.88      |
| Omega-3 index      | 4.98 $\pm$ 1.67  | 5.01 $\pm$ 1.73        | 4.88 $\pm$ 1.53      |

Student's t-test was used for comparison of fatty acid levels in cases and controls. \*p value<0.05. SFA, saturated fatty acid; MUFA, monounsaturated fatty acid; PUFA, polyunsaturated fatty acid; LC, long-chain.

**Supplementary Table S2.** Inflammatory markers concentrations (pg/ml) (mean  $\pm$  standard deviation) in serum at baseline in the study population

| <b>Inflammatory markers</b> | <b>Control</b>      | <b>Cases</b>        |
|-----------------------------|---------------------|---------------------|
| IFNg                        | 18.172 $\pm$ 11.536 | 16.797 $\pm$ 8.791  |
| IL10                        | 25.752 $\pm$ 36.138 | 22.524 $\pm$ 16.418 |
| IL1b                        | 2.209 $\pm$ 1.454   | 2.241 $\pm$ 1.71    |
| IL6                         | 3.956 $\pm$ 4.768   | 3.78 $\pm$ 3.321    |
| IL8                         | 11.025 $\pm$ 8.151  | 12.691 $\pm$ 10.941 |

Student's t-test was used for comparison of inflammatory markers levels in cases and controls. No significant differences were found ( $p > 0.05$ ).

**Supplementary Table S3.** Spearman's correlation analysis between baseline and 1-year levels of fatty acids

| <b>Fatty acids</b> | <b>Spearman r</b> | <b>p value</b> |
|--------------------|-------------------|----------------|
| C14:0              | 0.77              | <0.001         |
| C16:0              | 0.58              | <0.001         |
| C16:1n7cis         | 0.64              | <0.001         |
| C16:1n7trans       | 0.61              | <0.001         |
| C18:0              | 0.52              | <0.001         |
| C18:1n9cis         | 0.69              | <0.001         |
| C18:1n9trans       | 0.68              | <0.001         |
| C18:2n6            | 0.69              | <0.001         |
| C18:3n3            | 0.28              | <0.001         |
| C20:0              | 0.45              | <0.001         |
| C20:1n9            | 0.52              | <0.001         |
| C20:2n6            | 0.45              | <0.001         |
| C20:3n6            | 0.57              | <0.001         |
| C20:4n6            | 0.51              | <0.001         |
| C20:5n3            | 0.63              | <0.001         |
| C22:0              | 0.85              | <0.001         |
| C22:4n6            | 0.74              | <0.001         |
| C22:5n6            | 0.73              | <0.001         |
| C22:5n3            | 0.55              | <0.001         |
| C22:6n3            | 0.55              | <0.001         |
| C24:0              | 0.85              | <0.001         |
| C24:1n9            | 0.84              | <0.001         |

**Supplementary Table S4.** Spearman's correlation analysis between baseline and 1-year levels of inflammatory markers

| <b>Inflammatory markers</b> | <b>Spearman r</b> | <b>p value</b> |
|-----------------------------|-------------------|----------------|
| IFN-g                       | 0.85              | <0.001         |
| IL-6                        | 0.68              | <0.001         |
| IL-8                        | 0.64              | <0.001         |
| IL-10                       | 0.83              | <0.001         |
| IL-1b                       | 0.86              | <0.001         |
